# Supplementary material
Source: PubMed Central journal article supplement (PMC6685564)
Supplement: tpmd190171.SD1.pdf [file tpmd190171.SD1.pdf]

The following are supplemental materials and will be published online only

**Additional file 1: Table S1.** The classification of economies by GNI per capita \*

| <b>Economies</b>    | <b>GNI per capita, Atlas method (US\$)</b> |
|---------------------|--------------------------------------------|
| Low income          | $\leq 1,005$                               |
| Lower-middle income | 1,006~3,955                                |
| Upper-middle income | 3,956~12,235                               |
| High income         | $\geq 12,236$                              |

\*The data were retrieved from the World Bank. Abbreviations: US\$, United States dollar; GNI,

Gross national income.
